# Supplementary material for: Functional Analysis of Membrane-Associated Scaffolding Tight Junction (TJ) Proteins in Tumorigenic Characteristics of B16-F10 Mouse Melanoma Cells
Source: MDPI journal article supplement (doi:10.3390/ijms25020833), 2024-01-09
Supplement: s1 [file s1]

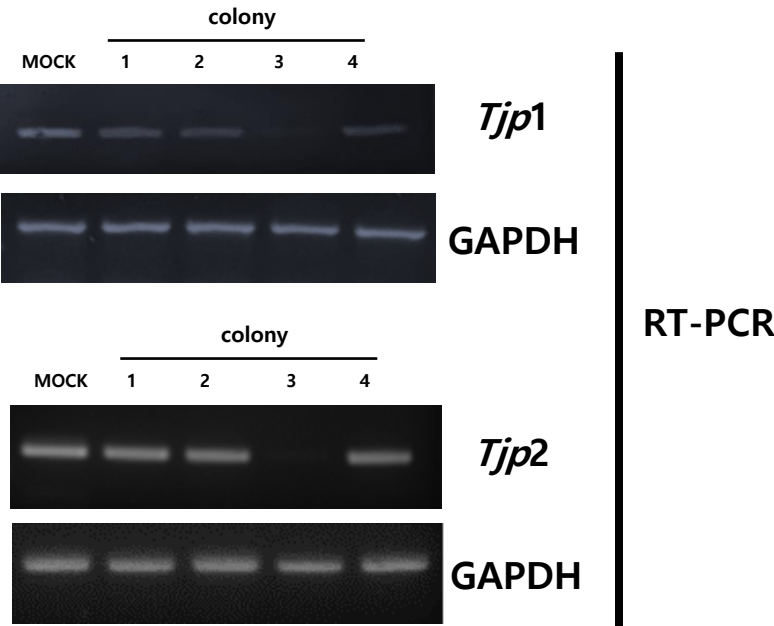

**Supplemental Figure S1.** After selecting the CRISPR/Cas9 system-transfected cells, we confirmed the *Tjp1* and *Tjp2* knockout clones using RT-PCR.

**TGTGTTGGGGAAATGTGCTG**AGCTCATGAGC  
TCCTACCAAGTAAGTTGTGCATTAGTTTGTGAT  
AAATAAATGTATCACTTAGTATGTTGGGACAAT  
TACACATATTGATAATGATGCACTGTCAAATTT  
TGATTAAGGAATGAGGTCAGGCTTGTGAGTTT  
GTTGTGGTTTTGGTTACAAAGTGTTCAATAAGAT  
ATGTGGTATCTTTAGAGTATAGTTCTAATCCTT  
CATTATTTTACACAAGTATTAATTATCACCTGG  
AAAATTGTTATAAATTCTGGAAGGATTTAGTAA  
ATTTACTGTTTAGCCAGATCTGTTTTATTAAGA  
GAGTGGAACACAGCCATTTTGGAACTGTATTG  
GTGTGATTACTCTATTATCTCCTTTGTATTTACA  
TAAGTCAAGGGAAATGTATGTTTCTCCTATGA  
GTGGAGAGTATATGACTATCGTTCAGTTTATTA  
TTTCTTTTTGTTTGTAG**ACTATCCGAAGGAAGA**  
**AGAAAGTTCAGATCCCTGTAAGTCACCCAGAT**  
**CCTGAGCCGGTGTCTGATAATGAAGACGATAG**  
**TTATGACGAAGAAGTGCATGACCCAAGAGCTG**  
**GCCGCGGTGCTTTAGCGAACAGAAGGAGCGA**  
**GAAGAGCTGGGCAAGGGATAGGAGTGCAAGC**  
**AGGGAGAGGAGCCTGTCC****CCTCGCTCGGACA**  
**GGCGGTCCGT**GGCCTCCAGTCAGCCCGCAA  
GCCACCAAGGTCACACTGGTGAAGTCTCGG  
AAAAATGAAGGTATCACTGACTCTCACTGTTCT  
CACGTGAGACTTTTAAAGCTAGTTTAATAAGA  
AATACAATGACCATCTTATCTGGTTTTTTTCCAT  
TTCTCTTTCTAGTCATGTTATCTTGCTAAGAGTC  
AAATCCTGGTAAGGTAGACATTGGGATATTTT  
GGAACCTTTTCTCAAATCATTTTGTGGTGCAA  
ACTTGATGTTGAATTTTGGTTTTATTGGAACAG  
GAATAGCCAAATTCAAATTGTGCT**AGCAAGA**  
**AATGTTGGGCCAG**

Intron

Exon5

Intron

GTTGTCAGGGATACAGATGTTTAAGGTTTGTGT  
AGGTTTGTGTTTGGTTTGTGTTTGTATGACCCTCCC  
ACCCTCCTCACACACACTGAGACTAGAGACTGA  
CAGTTTTAATTAAACTGGATCCAGGCCCACTG  
CCCTCCCAGGTGTGTCTCTGCCGCCCTGCATCAT  
CTACTCTATTTGTCTGAATAG**GTGGTCAAGAGAC**  
**CCCGGAAGGTTCAAGGTGGCCCCACTGCAAGGC**  
**AGCCCCCTCTCAGTCATGACGACCGAGGTTT**  
**TGAAGTG**ATTGAAGAATTTGATGGCAGAAGTTT  
CCGCAGCGGCTACAGTGAGAGGAGTCGGCACA  
GCAGCCACGACATGCTCAGCCACAGCTGGGAG  
GGCAATAGGGAGAGGGGGCGACCCCATCAGC  
GCACACAGAGCCGGGAGCGGGAGCGCAGCCG  
TGGCAGGAGCCTGGAACGGGGCCTGGACCAG  
GAAGACTATGGGCGCAGCCGTGAGCGCAGCCG  
TGGCCGGAGCCTGGAGCGCGGGCTGGACCGC  
GACTTTGTGTCCAGGGACCACAGCCGTGGCCG  
TAGCATCGACAGGGACTACGACCGAGACTATGA  
GCGCTCCTATCA**GAAGCTTATGAACCCGACT**  
**ACGG**AGGCGGCTACAGCCCATCATATGACCGTA  
GAGCCCATCCAGAGACCCGCTATGAACGGAGC  
CGCAGCCGAGAACACCTACGTTCCCGAAGCCC  
CAGCCCCGAGTCTAGGTCACGG**CATGAACACA**  
**AGGGCCAACA**TGATCCCGACAGGCCCATCGG  
GGTCCTTCTAACCAAAAGCAAAGCAAATGAAG  
GTAGGCACACATGGTGTGGGGATACAAGCTGTA  
CCTGCAGCAGCATCACCTGGTGTCTGCCTGGCA  
CCTGCCAGTGTTACGCGTCAACCCGAAGTGGCC  
AGCACCTATGGACTCATTTAGTTATCACTGCCAT  
AAGAGAGTCAGAGATGCAGAAGGGTCCATTGA  
TCTGGACGTAGTTGTCCAGTGGCAAAGCCAGG  
TCTTAAGAGATGTTCTTAAGT

Intron

Exon5

Intron

Sequence : Primer  
Red : gRNA

**Supplemental Figure S2.** Amplifying the gRNA-selected region using specific primers.
